# Supplementary material for: VDR regulates simulated microgravity-induced atrophy in C2C12 myotubes
Source: PubMed Central journal article supplement (PMC8791983; doi:10.1038/s41598-022-05354-0), 2022-01-26
Supplement: 41598_2022_5354_MOESM1_ESM.pdf [file 41598_2022_5354_MOESM1_ESM.pdf]

## Supplementary Table

### qPCR primers used in the study

|                        | Forward               | Reverse                 |
|------------------------|-----------------------|-------------------------|
| qPCR                   |                       |                         |
| <i>Actb</i>            | GGCTGTATTCCCCTCCATCG  | CCAGTTGGTAACAATGCCATGT  |
| <i>Fbxo32</i>          | GAGTGGCATCGCCAAAAGA   | TCTGGAGAAGTTCCCGTATAAGT |
| <i>Trim63</i>          | GTGTGAGGTGCCTACTTGCTC | GCTCAGTCTTCTGTCCTTGGA   |
| <i>Myog</i>            | AGTGAATGCAACTCCCACAG  | ACGATGGACGTAAGGGAGTG    |
| <i>MyoD</i>            | GGCTACGACACCGCCTACTA  | GAGATGCGCTCCACTATGCT    |
| <i>Myh3</i>            | AAAAGGCCATCACTGACGC   | CAGCTCTCTGATCCGTGTCTC   |
| <i>Myh4</i>            | GCTTGAAAACGAGGTGGAAA  | CCTCCTCAGCCTGTCTCTTG    |
| <i>Fbxo32</i> intron 4 | CCTCATGGACTGAAGAGCGG  | GGACAGAGTGACCTGGCAAA    |

The sequence of qPCR primers used in this study is listed.

a

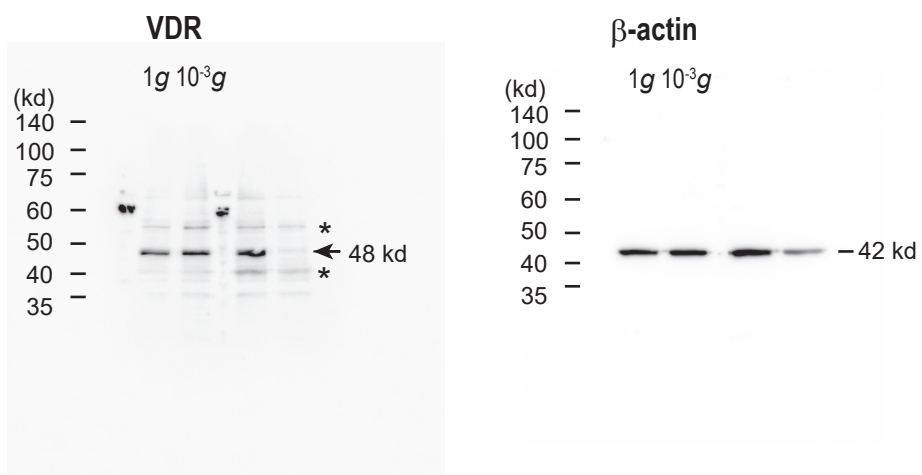

b

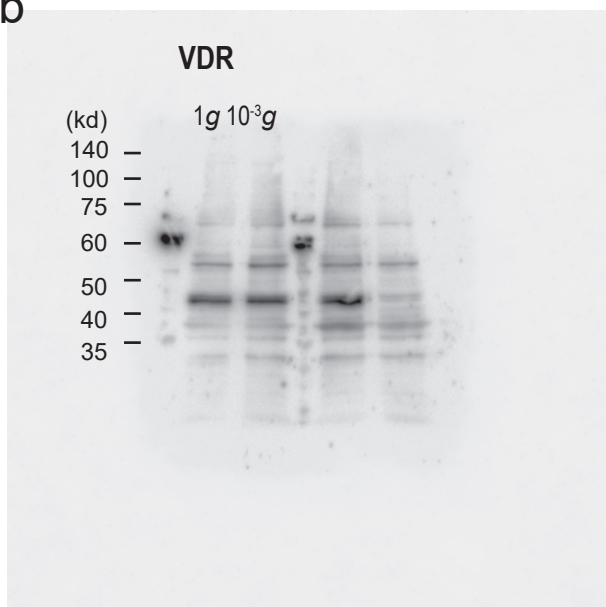

c

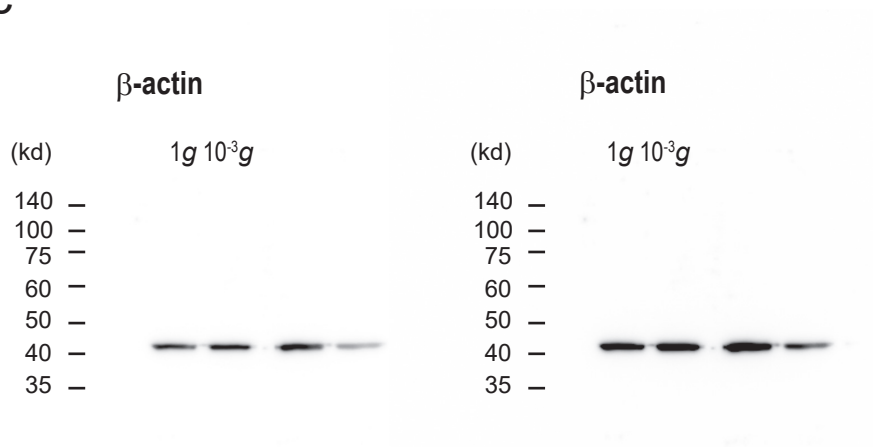

d

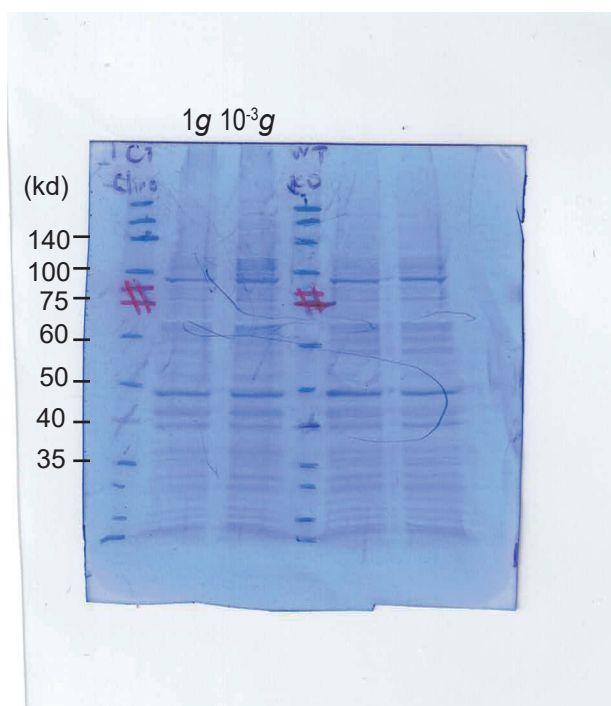

**a**

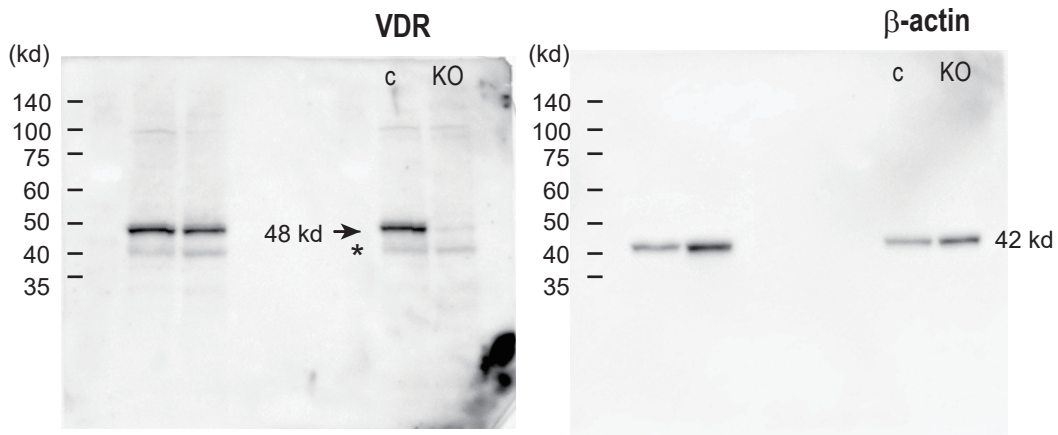

**b**

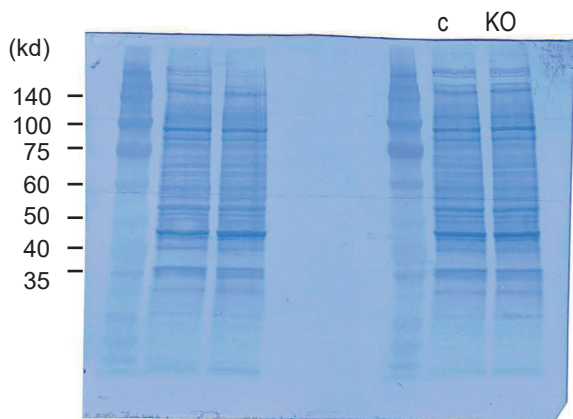

**a**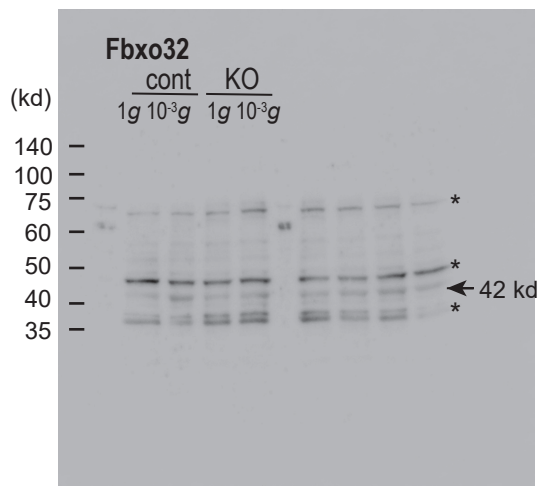**b**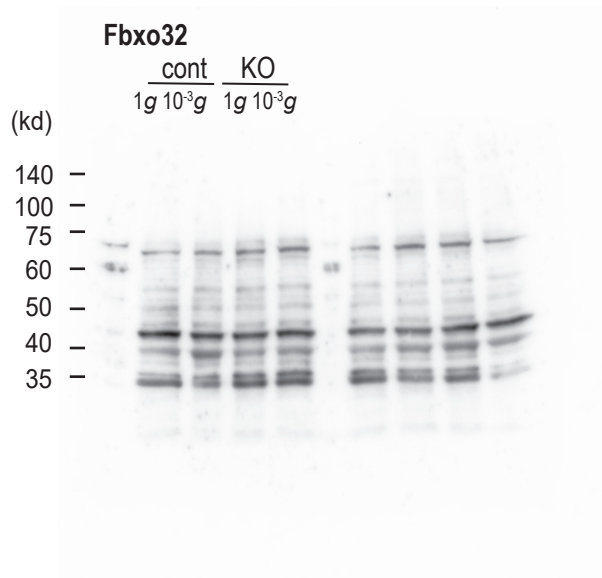**c**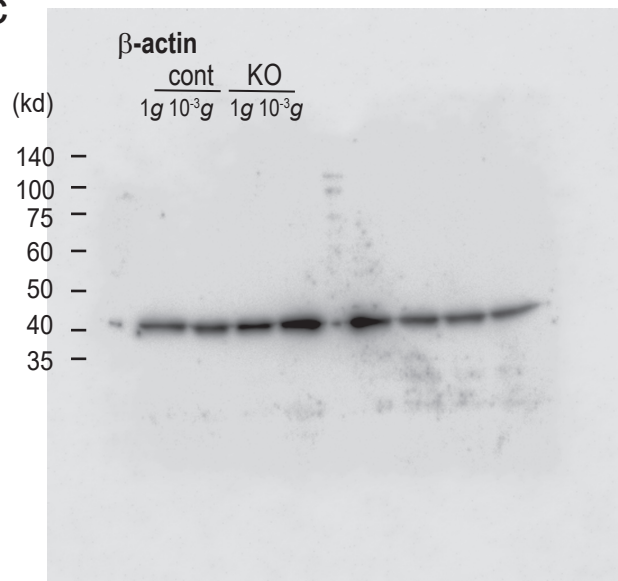**d**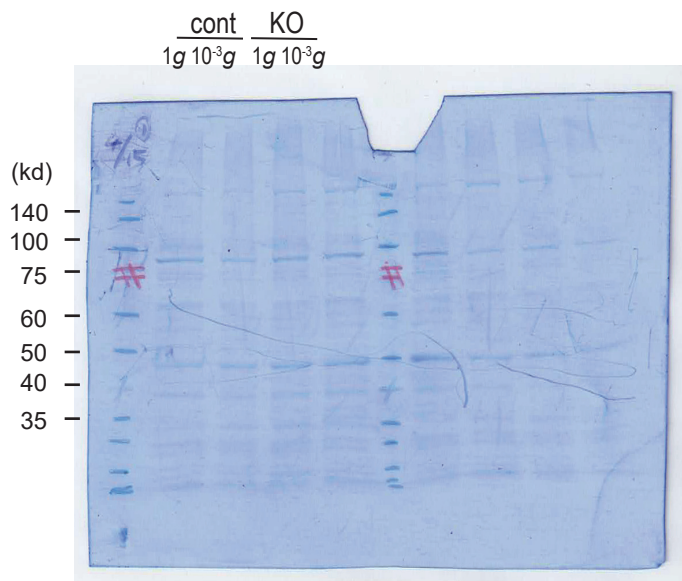

a

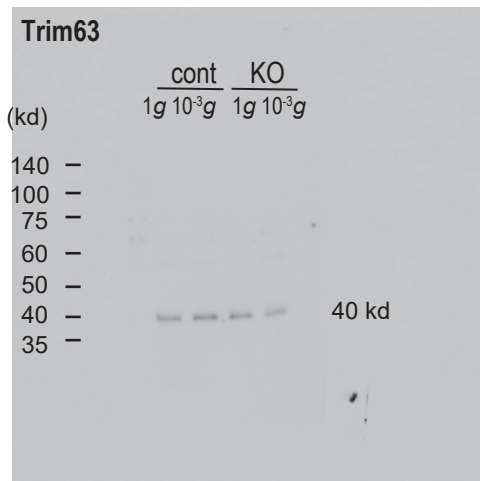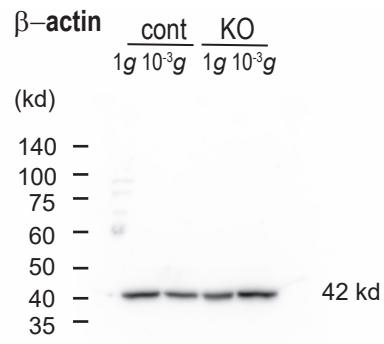

b

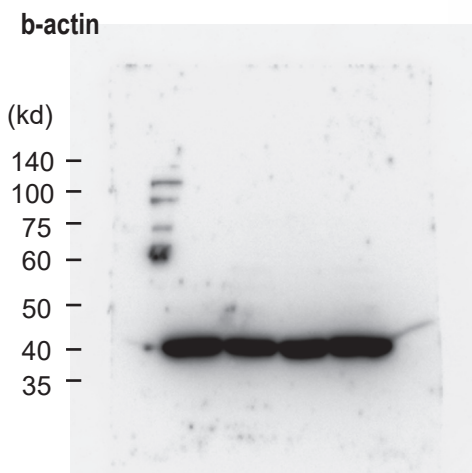

c

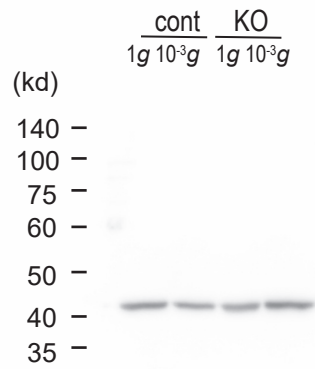

d

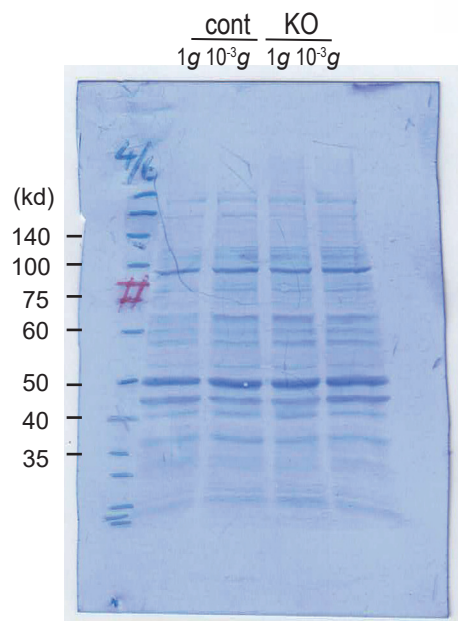

## Figure legends for supplemental figures

### Supplemental Figure 1

- a) Images of the original blots corresponding to Figure 2b. The membrane was trimmed prior to hybridization with the antibodies. The membrane hybridized with VDR antibody was reprobed with  $\beta$ -actin antibody. The arrow shows bands corresponding to VDR.
- b) An original image of VDR with a longer exposure time.
- c) Original images of  $\beta$ -actin with different exposure times.
- d) CBB staining of the membrane. Protein Ladder One Plus Triple-color for SDS-PAGE (Nacalai Tesque) was used as the molecular marker.

### Supplemental Figure 2

- a) Images of the original blots corresponding to Figure 3b. The membrane hybridized with VDR antibody was reprobed with  $\beta$ -actin antibody. The arrow shows bands corresponding to VDR. \*: non-specific bands.
- b) CBB staining of the membrane. Protein Ladder One Plus Triple-color for SDS-PAGE (Nacalai Tesque) was used as a molecular marker.

### Supplemental Figure 3

- a) Images of the original blots correspond to Figure 4d. The membrane was trimmed prior to hybridization with antibodies. The arrow shows bands corresponding to Fbxo32. \*: non-specific bands.
- b) An original image of Fbxo32 with a longer exposure time.
- c) An image of  $\beta$ -actin with a longer exposure time. The membrane hybridized with Fbxo32 antibody was reprobed with  $\beta$ -actin antibody.
- d) CBB staining of the membrane probed for Fbxo32 and  $\beta$ -actin. Protein Ladder One Plus, Triple-color for SDS-PAGE (Nacalai Tesque) was used as a molecular marker.

### Supplemental Figure 4

- a) Images of the original blots correspond to Figure 4d. The membrane was trimmed prior to hybridization with antibodies. The membrane hybridized with Trim63 antibody was reprobed with  $\beta$ -actin antibody.
- b) An original image of  $\beta$ -actin with a longer exposure time.
- c) An original image of  $\beta$ -actin with a shorter exposure time.
- d) CBB staining of the membrane probed for Trim63 and  $\beta$ -actin. Protein Ladder One

Plus Triple-color for SDS-PAGE (Nacalai Tesque) was used as a molecular marker.
